# Supplementary material for: Comparative Proteomic Analysis of Differentially Expressed Proteins in the Urine of Reservoir Hosts of Leptospirosis
Source: PLoS One. 2011 Oct 17;6(10):e26046. doi: 10.1371/journal.pone.0026046 (PMC3197145; doi:10.1371/journal.pone.0026046)
Supplement: Table S1 — Mascot-matched peptide sequences used for protein identification. (XLSX) [file pone.0026046.s001.xlsx]

## Sheet: Sheet1
Supplementary Table 1
	Lepto/Rat Database*
Rattus1	Peptides2	Accession3	Annotation4	Score5	Sequence coverage6
106	R.LGLPSR.D	gi|6981210	membrane metallo endopeptidase	656	23
	K.VMELEK.E
	K.DVLQEPK.T
	K.SIAQLNSK.Y
	R.AYQNYVK.K
	R.NVIPETSSR.Y
	K.TEDIVAVQK.A
	K.NSYMNPER.K
	K.LLPGLDLNHK.Q
	K.TDVHSPGNFR.I
	R.FIMDLVSSLSR.N
	R.LYVEAAFAGESK.H
	R.IGYPDDIISNENK.L
	R.LPIDENQLSLEMNK.V
	R.SESQMDITDINAPKPK.K
	R.NQIVFPAGILQPPFFSAR.Q
108	R.LGLPSR.D	gi|6981210	membrane metallo endopeptidase	101	9
	K.DVLQEPK.T
	K.TEDIVAVQK.A
	K.SIAQLNSK.Y
	R.NDPMLLYNK.Y
	R.AYQNYVK.K
	R.NSYMNPER.M
	K.TDVHSPGNFR.I
112	R.NVIPETSSR.Y	gi|6981210	membrane metallo endopeptidase	462	17
	K.DVLQEPK.T
	K.TEDIVAVQK.A
	K.SIAQLNSK.Y
	R.LGLPSR.D
	R.LPIDENQLSLEMNK.V
	K.VMELEK.E
	R.NDPMLLYNK.M
	R.FIMDLVSSLSR.N
	R.LYVEAAFAGESK.H
	R.IGYPDDIISNENK.L
	R.AYQNYVK.K
	K.TDVHSPGNFR.I
	K.NSYMNPER.K
122	R.NVIPETSSR.Y	gi|6981210	membrane metallo endopeptidase	595	30
	R.YSNFDILR.D
	R.YSNFDILRDELEVILK.D
	K.DVLQEPK.T
	K.TEDIVAVQK.A
	K.SIAQLNSK.Y
	R.DYYECTGIYK.E
	R.LPIDENQLSLEMNK.V
	R.NDPMLLYNK.M
	R.FIMDLVSSLSR.N
	K.ALYGTTSETATWR.R
	R.LYVEAAFAGESK.H
	K.HVVEDLIAQIR.E
	R.IGYPDDIISNENK.L
	K.LNNEYLELNYKEEEYFENIIQNLK.F
	R.NQIVFPAGILQPPFFSAR.Q
	R.AYQNYVK.K
	K.LLPGLDLNHK.Q
	K.TDVHSPGNFR.I
	R.IIGTLQNSAEFADAFHCR.K
259	K.SLQDIIAILGMDELSEEDKLTVSR.A	gi|54792127	ATP synthase, H+ transporting, mitochondrial F1 complex	58	4
503	K.FAIQYGTGR.L	gi|13928928	napsin A aspartic peptidase	40	2
516	K.FAIQYGTGR.L	gi|13928928	napsin A aspartic peptidase	113	11
	R.LLEKPVFSFYLNR.D
	R.FDGILGLGFPTLAVGGVQPPLDALVEQR.L
518	K.FAIQYGTGR.R	gi|13928928	napsin A aspartic peptidase	149	8
	R.FDGILGLGFPTLAVGGVQPPLDALVEQR.L
603	K.LGVTADDVK.N	gi|15100179	malate dehydrogenase 1, NAD (soluble)	34	2
621	K.SAPSIPK.E	gi|15100179	malate dehydrogenase 1, NAD (soluble)	70	5
	K.LGVTADDVK.N
	K.GEFITTVQQR.G
658	R.AELFSQMR.A	gi|57526957	aspartoacylase-3	98	14
	K.NLGSVDFPR.T
	R.AQELNQLLGPK.G
	R.ISVPALPGLTPSSTQTP.-
659	R.AELFSQMR.A	gi|57526957	aspartoacylase-3	83	8
	K.NLGSVDFPR.T
	R.AQELNQLLGPK.G
674	R.AELFSQMR.A	gi|57526957	aspartoacylase-3	38	5
	K.NLGSVDFPR.T
Leptospira1	Peptides2	Accession3	Annotation4	Score5	Sequence coverage6
1	K.SSFVLSEDTIPGTNETVK.T	gi|45600468	LipL32	241	18
	R.MISPTGEIGEPGDGDLVSDAFK.A
	R.MSAIMPDQIAK.A
2	R.MSAIMPDQIAK.A	gi|45600468	LipL32	96	4
310	K.LLEGVNK.L	gi|45600451	GroEL	1126	52
	K.ALEEPIR.R
	K.FGAPTITK.D
	K.AQEAVGSLK.Y
	R.VEDALSATR.A
	K.DLIHILEK.V
	K.DGVITVEEAK.S
	K.AVTAAVESIQK.R
	K.NVTAGANPMSLK.K
	K.LENTTLQMLGR.A
	K.VTVDKENTTIIEGK.G
	R.AAVEEGIVPGGGLTLLK.A
	K.SIETTLDVVEGMQFDR.G
	K.EIELEDPLENMGAQMVK.E
	K.SMLEDIAILTGGQVISEDLGMK.L
	K.DIANVASISANNDNTIGNLIADAMDK.V
	K.VAQAGKPLVIISEEVEGEALATIVVNTLR.K
	R.SALQNAASIGSMILTTEVTITDKPDK.D
313	M.AKDIEYNETAR.R	gi|45600451	GroEL	690	28
	K.LLEGVNK.L
	K.VTLGPK.G
	K.FGAPTITK.D
	K.NVTAGANPMSLK.K
	K.AVTAAVESIQK.R
	K.DGVITVEEAK.S
	K.DLIHILEK.V
	K.APGFGDR.R
	K.LENTTLQMLGR.A
	K.VTVDKENTTIIEGK.G
	R.VEDALSATR.A
	R.AAVEEGIVPGGGLTLLK.A
	K.AQEAVGSLK.L
	K.LDGDEATGAK.I
	R.ALEEPIR.M
314	K.LLEGVNK.R	gi|45600451	GroEL	493	14
	K.FGAPTITK.D
	K.AQEAVGSLK.L
	R.VEDALSATR.A
	K.AVTAAVESIQK.A
	K.LENTTLQMLGR.A
315	R.VEDALSATR.A	gi|45600451	GroEL	476	31
	K.DLIHILEK.V
	K.DGVITVEEAK.S
	K.AVTAAVESIQK.R
	K.NVTAGANPMSLK.K
	K.LENTTLQMLGR.A
	K.VTVDKENTTIIEGK.G
	R.AAVEEGIVPGGGLTLLK.A
	K.SIETTLDVVEGMQFDR.G
	K.LAGGVAVIHVGAATEVEMK.E
	K.EIELEDPLENMGAQMVK.E
	K.DIANVASISANNDNTIGNLIADAMDK.V
652	R.TQILGLR.R	gi|45600643	Flagellin	866	45
	R.ADLGAYYNR.L
	R.AGDDASGLAVSEK.M
	K.ANSVIGLADDALR.S
	R.DTDMAEQMTSFTR.Y
	MIINHNISAIFAHR.T
	K.GLMNAYENIQAAESR.I
	R.VLAVQAANGIYTEEDR.Q
	R.IRDTDMAEQMTSFTR.Y
	R.YQILTQAATAMLAQANMKPQTVLQLLK.-
1008	K.TNAPVIK.E	gi|45599329	Loa22	131	14
	K.QGIPANR.I
	K.GAGSSEPVSGLDAKDA.K
*Similar results were obtained from the Leptospira/Rat and NCBI non redundant database
1Spot numbers identified as proteins from L. interrogans or R. norvegicus.
2Peptides used to identify protein
3Accession number
4Protein annotation
5Mascot score of matched peptides
6% coverage
